# Supplementary material for: Bioluminescence Production by Turnip Yellows Virus Infectious Clones: A New Way to Monitor Plant Virus Infection
Source: MDPI journal article supplement (doi:10.3390/ijms232213685), 2022-11-08
Supplement: s1 [file s1]

Table S1: Primers used in the experiments.

| Primers | 5' -> 3' Sequence                                                                                                                           |
|---------|---------------------------------------------------------------------------------------------------------------------------------------------|
| FP3     | <u>GCTGTGTTAGACGGTCGC</u> <u>ATGGTCTTCACACTCGAAG</u>                                                                                        |
| RP1     | GGTCAGGTTGTATCCCTTCAT <u>ATTCATACGGGATGATGACATG</u>                                                                                         |
| FP2     | <u>CATGTCATCATCCCGTATGAA</u> TGAAGGGATACAACCTGACC                                                                                           |
| RP3     | <u>CTTCGAGTGTGAAGACCAT</u> GCGACCGTCTAACACAGC                                                                                               |
| FP4     | <u>GAGGCTTGCCCTTCCTGTT</u> <u>ATGGTCTTCACACTCGAAG</u>                                                                                       |
| RP4     | GGTCAGGTTGTATCCCTTCAT <u>TTACGCCAGAATGCGTTTCG</u>                                                                                           |
| FP5     | <u>CGAACGCATTCTGGCGTAA</u> TGAAGGGATACAACCTGACC                                                                                             |
| RP5     | <u>CTTCGAGTGTGAAGACCAT</u> AACAGGAAGGGGAAGCCTC                                                                                              |
| 221     | ATTGTCGACACCGAAGTGCCGTA                                                                                                                     |
| 946     | ATGGTCTTCACACTCGAAGA                                                                                                                        |
| 947     | CGCCAGAATGCGTTTCGCACA                                                                                                                       |
| 1048    | GGTCTGAGCGGCGAC                                                                                                                             |
| Luc-For | <i>cta</i> <u>TCTAG</u> <i>ATG GGG GGT CTG AGC GGC GAC</i><br><i>XbaI M G G L S G D</i>                                                     |
| Luc-Rev | <u>AGT</u> <u>GAGCTC</u> <u>CACAGATCCTCTTCGGATATCAGCTTTTGTTC</u> <u>GCTGCCGCGCCAG</u> CGCCAGAATGCG<br><i>SacI myc tag linker C66Luc end</i> |

Underlined sequences are complementary to NanoLuciferase sequence.
